# Supplementary material for: Using artificial intelligence to identify patients with migraine and associated symptoms and conditions within electronic health records
Source: PubMed Central journal article supplement (PMC10349448; doi:10.1186/s12911-023-02190-8), 2023-07-14
Supplement: 12911_2023_2190_MOESM1_ESM.pdf [file 12911_2023_2190_MOESM1_ESM.pdf]

## Supplemental Figure 1. Advanced RWE versus Traditional RWE with Unstructured EHR Migraine and Headache Data

**Objective:** To use unstructured data from electronic health-records (EHR) to develop and validate an approach to identify concepts associated with the presence and progression of migraine in real-world settings.

**Conclusion:** An algorithm based on unstructured data from EHRs is almost as accurate as manual chart abstraction and better than traditional real-world evidence (RWE) in identifying patients with migraine.

**Methods:** Algorithms based on traditional and advanced RWE were developed and ability to detect migraine was compared

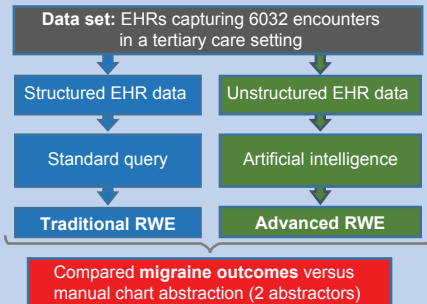

**Findings:** Manual abstraction was consistent and reliable. Compared with manual abstraction, recall for migraine and headache and migraine-associated symptoms was significantly higher for advanced RWE than for traditional RWE

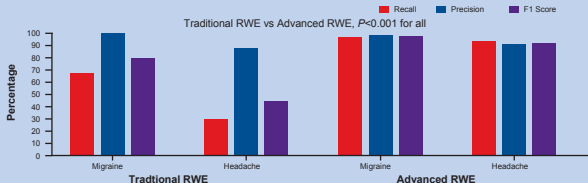

Enhanced recall, precision and F1 score was reported for advanced RWE algorithm compared with the traditional RWE algorithm
